# Supplementary material for: Neurotoxicity of different amyloid beta subspecies in mice and their interaction with isoflurane anaesthesia
Source: PubMed Central journal article supplement (PMC7714346; doi:10.1371/journal.pone.0242989), 2020-12-03

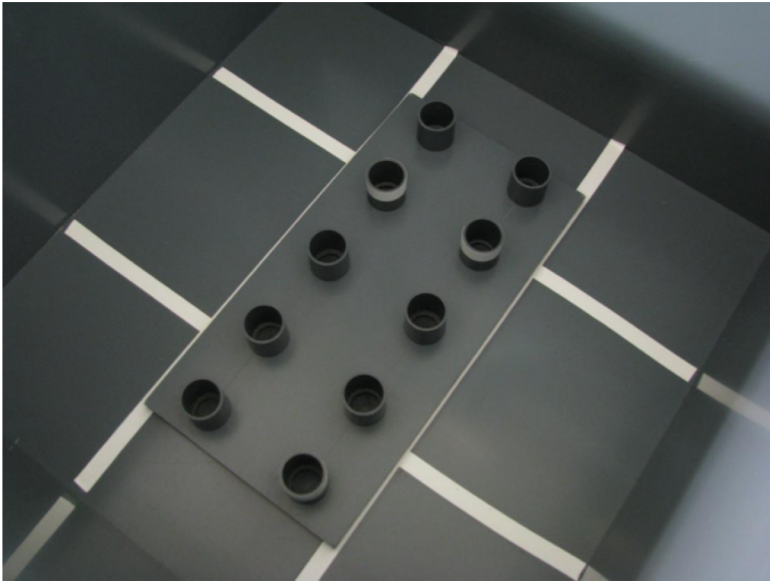

Supplement: pone.0242989.s001.pdf [file pone.0242989.s001.pdf]
